# Supplementary material for: Dissociable Physiological Biomarkers of Psychiatric Symptoms in Parkinson’s disease in the Subthalamic Nucleus: Evidence from Deep Brain Stimulation Intracranial Recordings
Source: Research Square preprint supplement (doi:10.21203/rs.3.rs-6231369/v1), 2025-04-07
Supplement: Supplementary file 1 [file 0455ae539ad263fb35531d6b.docx]

**Supplementary Information for**

Dissociable Physiological Biomarkers of Psychiatric Symptoms in Parkinson’s disease in the Subthalamic Nucleus: Evidence from Deep Brain Stimulation Intracranial Recordings

Linbin Wang1,2,3, Ying Zhao3, Peng Huang1, Qiong Ding3, Tao Wang1, Xian Qiu1, Bomin Sun1, Yixin Pan1, Dianyou Li1, Valerie Voon1,2,3

1 Department of Neurosurgery, Center for Functional Neurosurgery, Ruijin Hospital, Shanghai Jiao Tong University School of Medicine, Shanghai, China

2 Institute of Science and Technology for Brain-Inspired Intelligence (ISTBI), Fudan University, Shanghai, China

3 Department of Psychiatry, University of Cambridge, Cambridge, United Kingdom

**Eye-open dataset validation**

Depression: There were marginal positive correlations between BDI-2 scores and both absolute power (Spearman’s r = 0.27, p = 0.06) and relative power (Spearman’s r = 0.26, p = 0.07) of the alpha band within the STN.

Apathy: The AES-PD score showed significant positive correlations with the absolute power of the beta band in the STN (low beta: Spearman’s r = 0.42, p = 0.004; high beta: Spearman’s r = 0.34, p = 0.02), as well as with both the absolute (Spearman’s r = 0.53, p = 0.001) and relative power (Spearman’s r = 0.65, p < 0.001) of the theta band in the EEG. Furthermore, the AES-PD score exhibited remarkable negative correlations with both the absolute (low gamma: Spearman’s r = -0.51, p = 0.002; hγ: Spearman’s r = -0.39, p = 0.02) and relative power (low gamma: Spearman’s r = -0.50, p = 0.003; hγ: Spearman’s r = -0.35, p = 0.04) of the γ band in the EEG.

Anxiety: We found a significant negative correlation between BAI scores and the low gamma band of EEG absolute power in the eye-open dataset (Spearman’s r = -0.41, p = 0.014).

Impulsive-compulsive disorders: UPPS-P scores were negatively correlated with both absolute (Spearman’s r = -0.41, p = 0.007) and relative (Spearman’s r = -0.36, p = 0.021) power in the low gamma band of the STN. Similarly, OCI-R scores showed negative correlations with both absolute (Spearman’s r = -0.33, p = 0.031) and relative (Spearman’s r = -0.34, p = 0.028) low gamma power in the STN.

For sample entropy, depression was associated with increased sample entropy in the alpha band (r = 0.26, p = 0.069) in the STN; apathy with elevated entropy in high beta (r = 0.30, p = 0.044) in the STN and theta (r = 0.48, p = 0.004) and alpha (r = 0.41, p = 0.017) in frontal EEG, alongside reduced gamma (low gamma: r = -0.48, p = 0.004; high gamma: r = -0.38, p = 0.026) in frontal EEG; anxiety with reduced low gamma entropy (r = -0.39, p = 0.021) in frontal EEG; impulsivity with diminished delta (r = -0.38, p = 0.016) and low gamma (r = -0.42, p = 0.007); and compulsivity with decreased delta (r = -0.31, p = 0.042) and low gamma (r = -0.34, p = 0.027) sample entropy in the STN.

**Confounding considerations**

We performed partial correlations between depression score and alpha power, controlling for apathy scores and the on-medication MDS-UPDRS III score. The correlation remained high for both absolute (AES-PD: Spearman’s r = 0.34, p = 0.04; on-medication MDS-UPDRS III: Spearman’s r = 0.27, p = 0.07) and relative (AES-PD: Spearman’s r = 0.32, p = 0.04; on-medication MDS-UPDRS III: Spearman’s r = 0.31, p = 0.04) power in the alpha band.

We conducted partial correlations between AES-PD scores and absolute high beta power, controlling for: on/off-medication MDS-UPDRS III score, LEDD and LEDD dopamine agonists. The correlation remained strong (LEDD: Spearman’s r = 0.47, p = 0.002; LEDD dopamine agonists: Spearman’s r = 0.39, p = 0.011; on-medication MDS-UPDRS III: Spearman’s r = 0.39, p = 0.011; off-medication MDS-UPDRS III: Spearman’s r = 0.38, p = 0.011). Similarly, partial correlations between UPPS scores and low gamma power, controlling for LEDD and LEDD dopamine agonists, showed significant correlations for both absolute (LEDD: Spearman’s r = -0.41, p = 0.011; LEDD dopamine agonists: Spearman’s r = -0.39, p = 0.011) and relative low gamma power (LEDD: Spearman’s r = -0.37, p = 0.019; LEDD dopamine agonists: Spearman’s r = -0.32, p = 0.045).
